# Supplementary material for: Ultrafast photoinduced dynamics of the 3,6-diaminoacridinium derivative ATTO 465 in solution
Source: Royal Society of Chemistry journal article supplement (doi:10.1039/c2cp43493h), 2012-12-18
Supplement: c2cp43493h.pdf [file c2cp43493h.pdf]

## Electronic Supplementary Information

### "Ultrafast photoinduced dynamics of the 3,6-diaminoacridinium derivative ATTO 465 in solution"

by Jutta Arden-Jacob,<sup>a,b</sup> Karl-Heinz Drexhage,<sup>a,b</sup> Sergey I. Druzhinin,<sup>a</sup> Maria Ekimova,<sup>a</sup>  
Oliver Flender,<sup>a</sup> Thomas Lenzer,<sup>\*,a</sup> Kawon Oum,<sup>a</sup> and Mirko Scholz<sup>c</sup>

<sup>a</sup> Universität Siegen, Physikalische Chemie, Adolf-Reichwein-Str. 2, 57076 Siegen, Germany. Tel: +49 271 740 2803; Fax: +49 271 740 2805; E-mail: lenzer@chemie.uni-siegen.de, oum@chemie.uni-siegen.de

<sup>b</sup> ATTO-TEC GmbH, Am Eichenhang 50, 57076 Siegen, Germany

<sup>c</sup> Max-Planck-Institut für biophysikalische Chemie, Am Fassberg 11, 37077 Göttingen, Germany

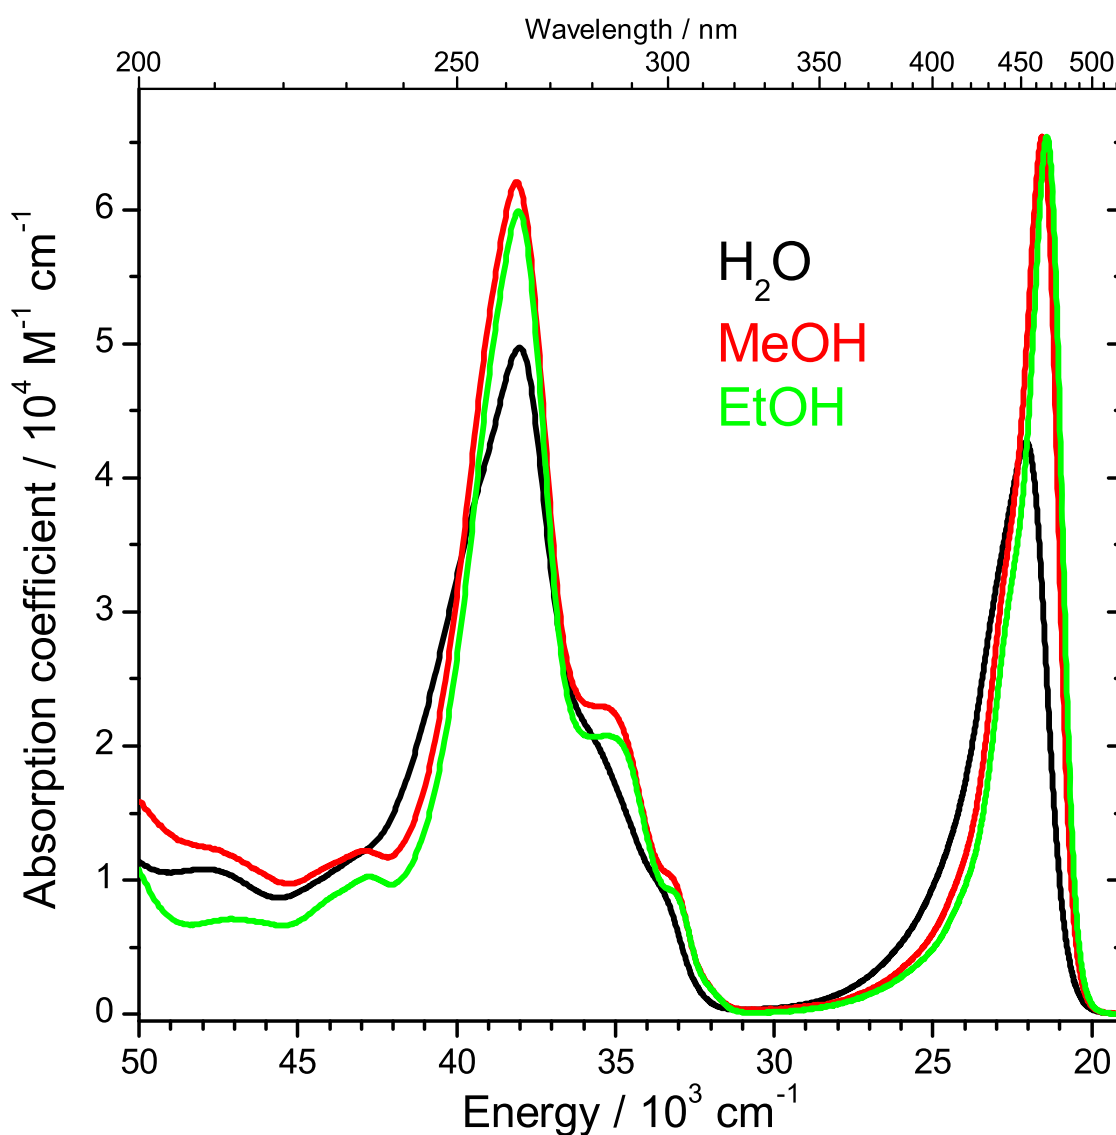

**Fig. S1** Steady-state absorption coefficient spectra of ATTO 465 in ethanol, methanol and water.

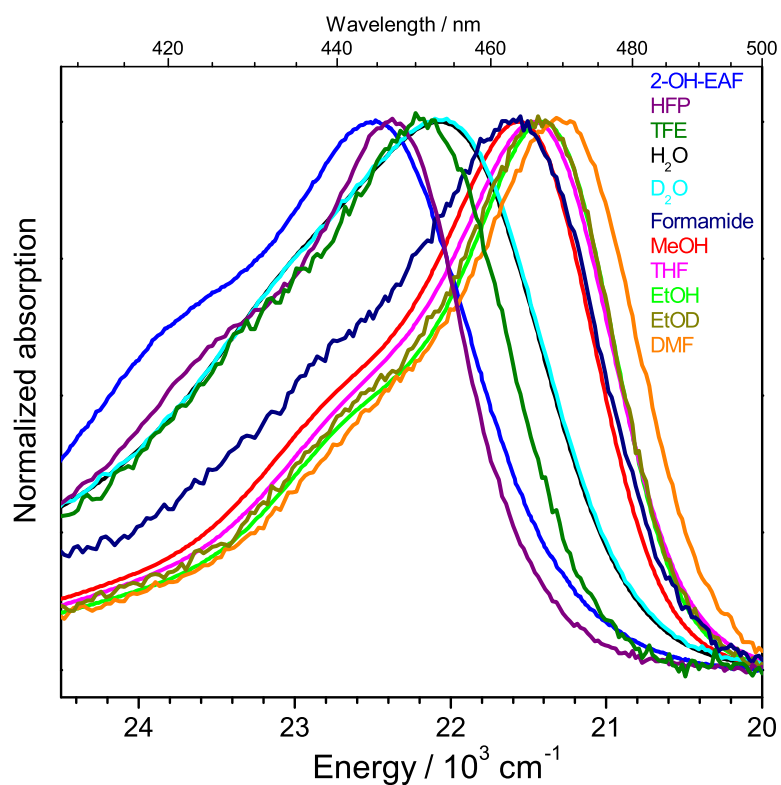

**Fig. S2** Normalized steady-state absorption spectra of the  $S_0 \rightarrow S_1$  band of ATTO 465 for all solvents of Table 1 (main text).

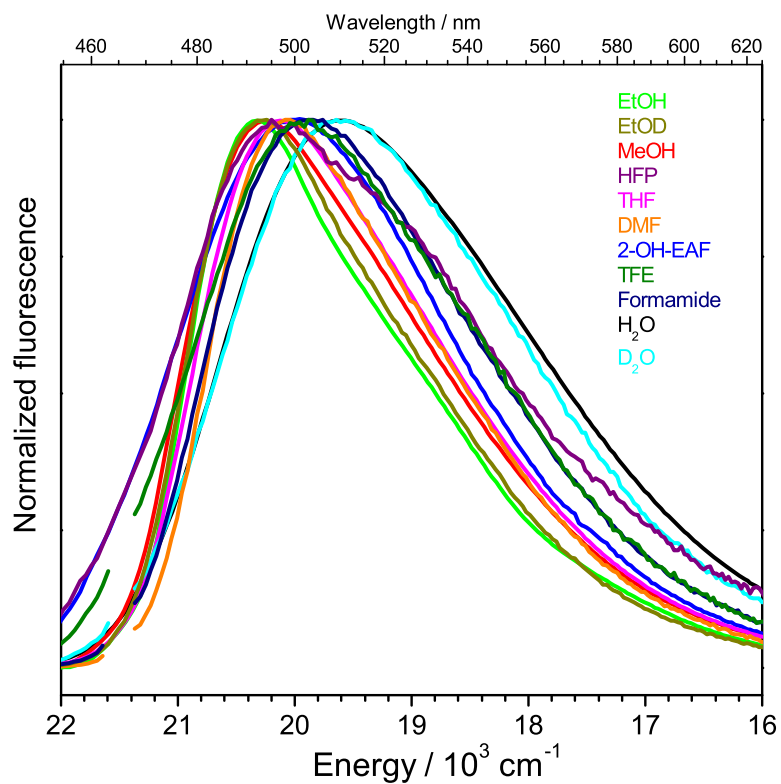

**Fig. S3** Normalized steady-state fluorescence spectra of the  $S_1 \rightarrow S_0$  band of ATTO 465 for all solvents of Table 1 (main text). For the sake of clarity, straylight peaks originating from the excitation light were removed or subtracted in the region  $21000\text{--}22000 \text{ cm}^{-1}$ .

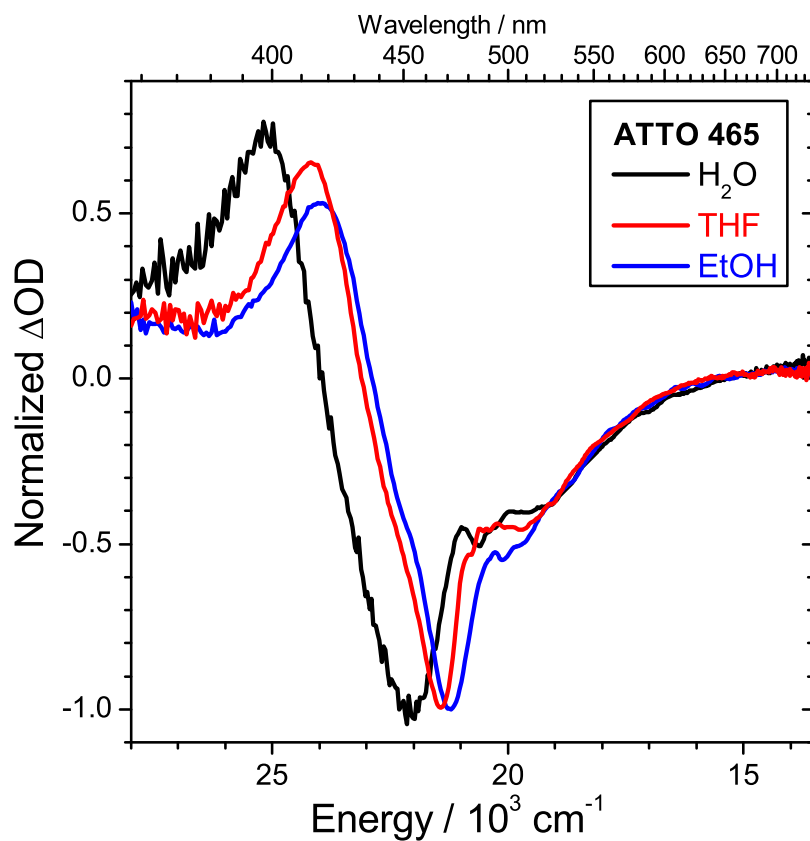

**Fig. S4** Comparison of PSCP spectra for ATTO 465 in water (black), THF (red) and ethanol (blue), each averaged in the range 100–200 ps.  $\lambda_{\text{pump}} = 481 \text{ nm}$  (THF, water) or 489 nm (ethanol).

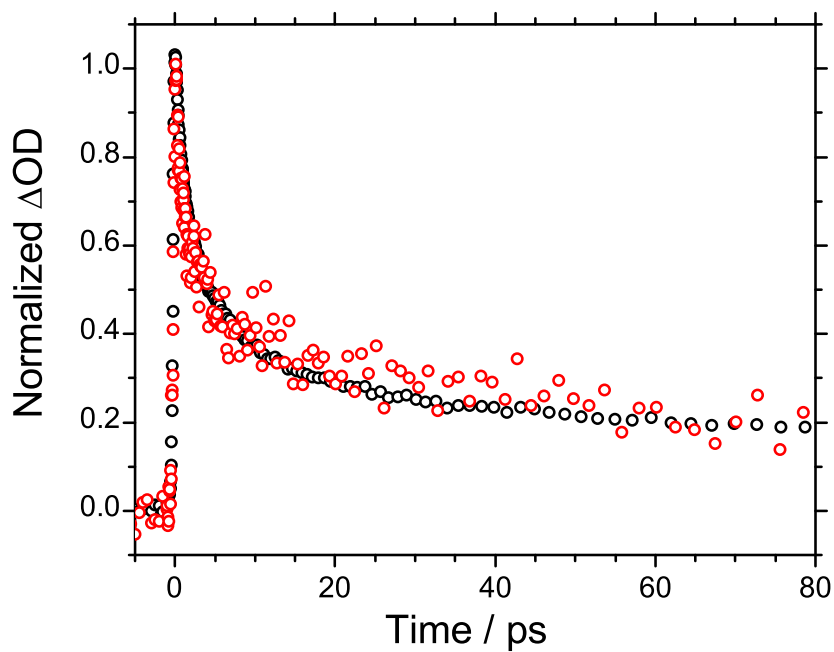

**Fig. S5** Comparison of single wavelength transient absorption signals in water for different concentrations of ATTO 465. Black:  $ca. 3 \cdot 10^{-5} \text{ M}$ ; red:  $ca. 3 \cdot 10^{-6} \text{ M}$ .  $\lambda_{\text{pump}} = 430 \text{ nm}$ ,  $\lambda_{\text{probe}} = 860 \text{ nm}$ .
